# Supplementary material
Source: publisher site journal article supplement (https://www.dovepress.com/article/280203)
Supplement: Supplementary file 1 [file get_supplementary_file.php]

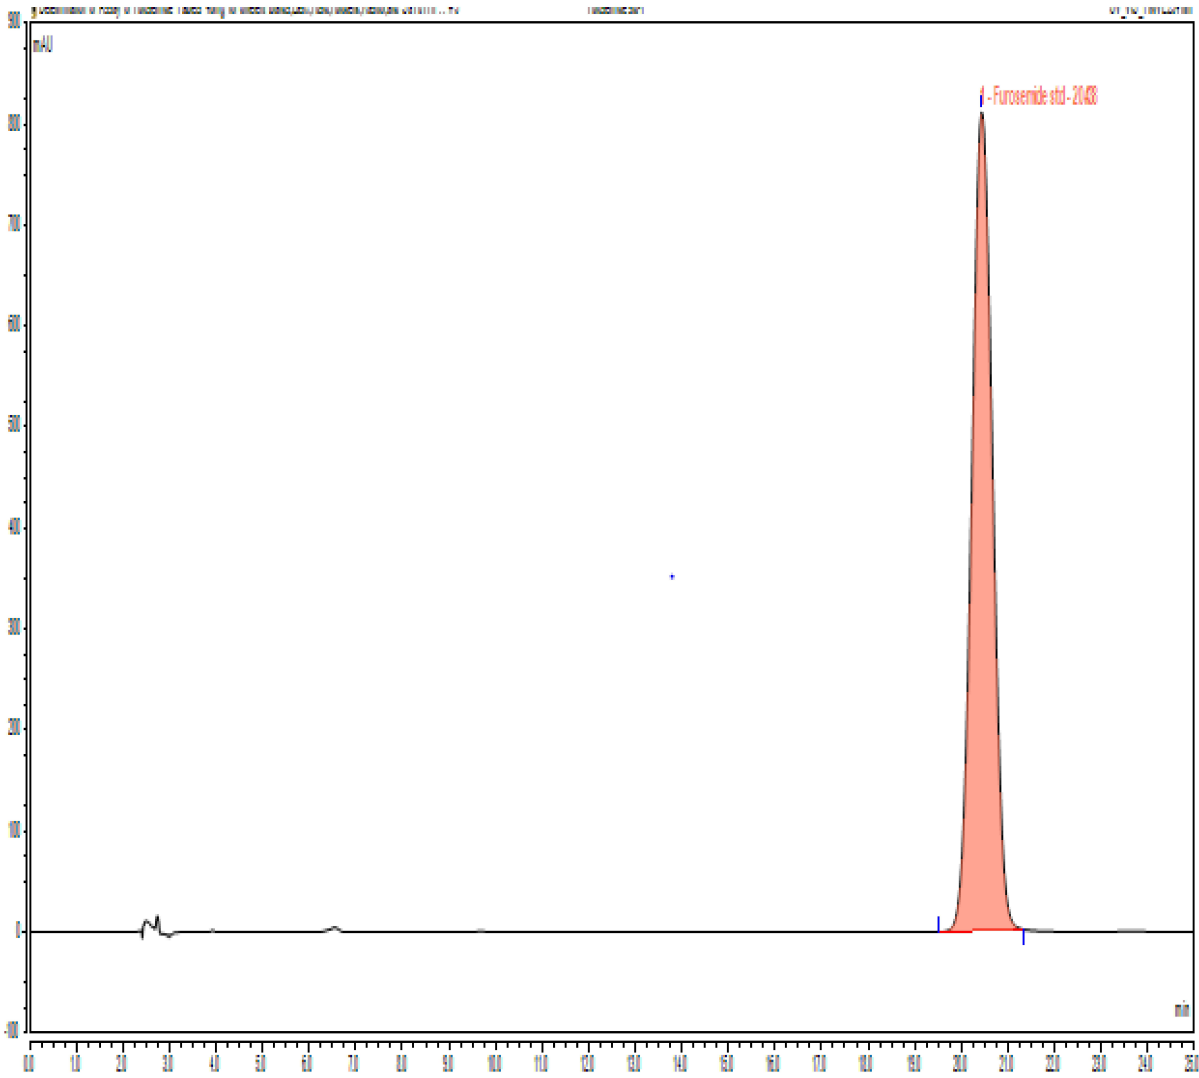

Figure S1: Chromatogram of furosemide standard

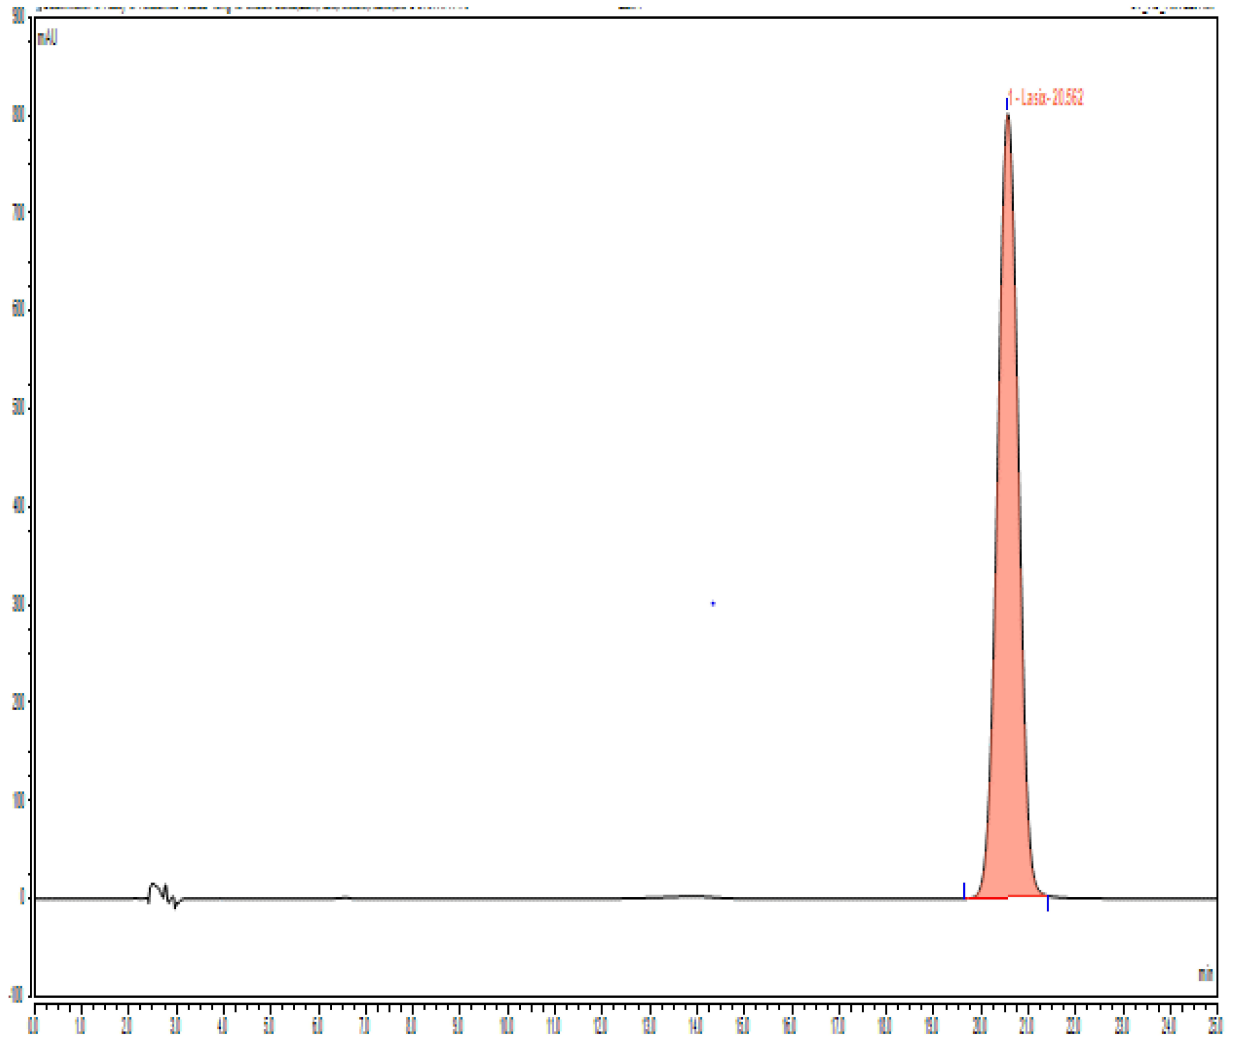

Figure S2: Chromatogram of Lasix tablets

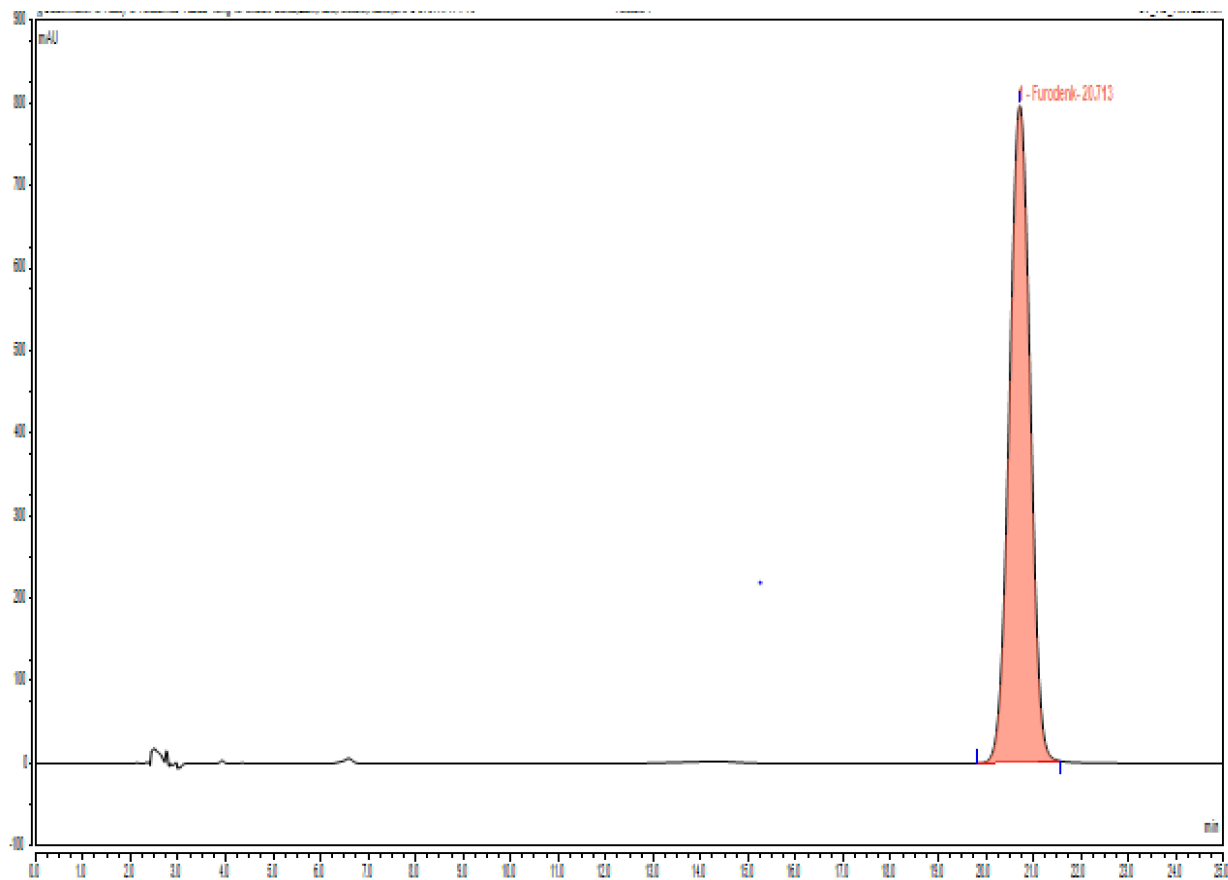

Figure S3: Chromatogram of Furo Denk tablets

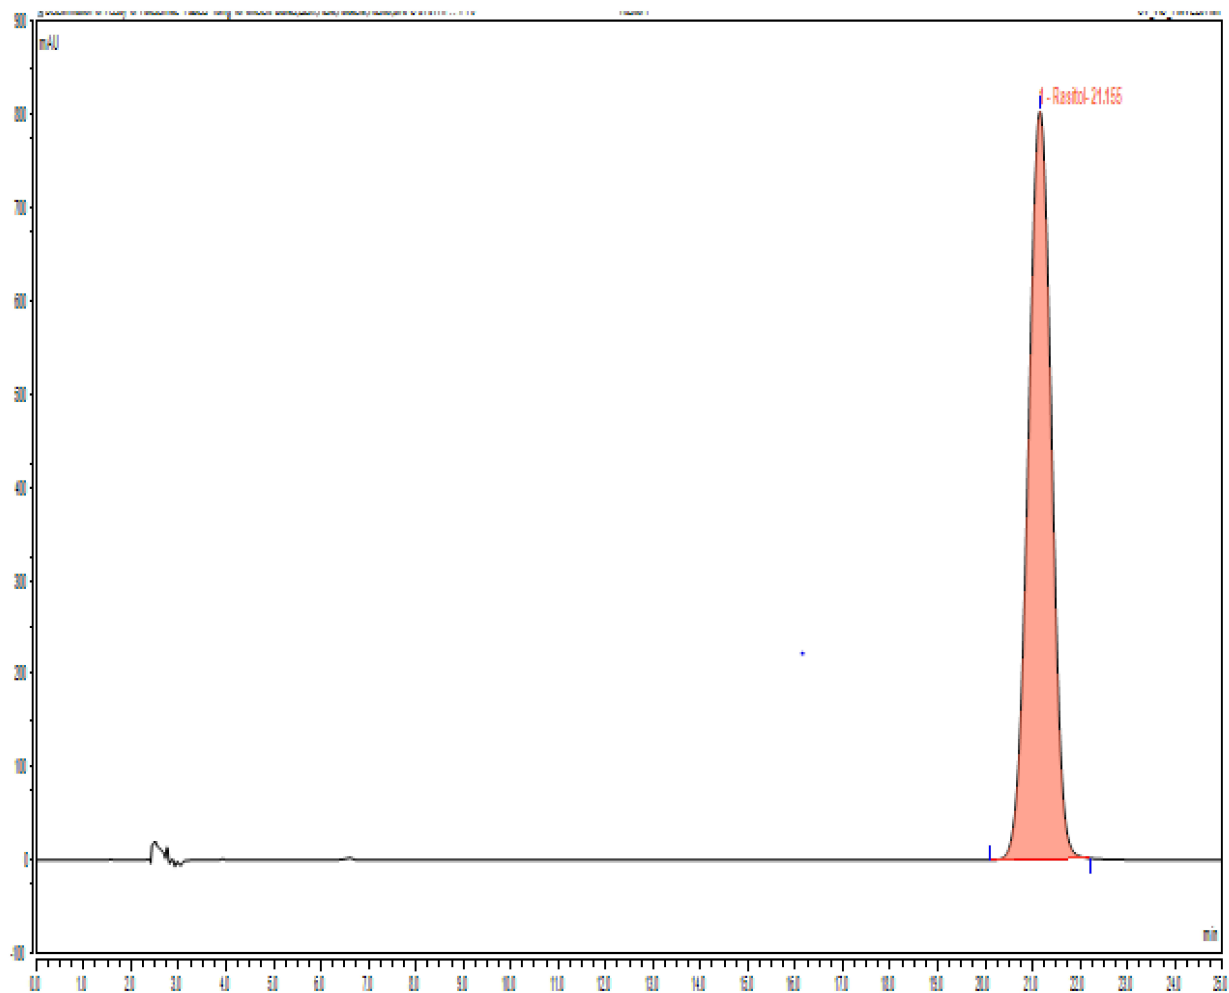

Figure S4: Chromatogram of Rasitol tablets



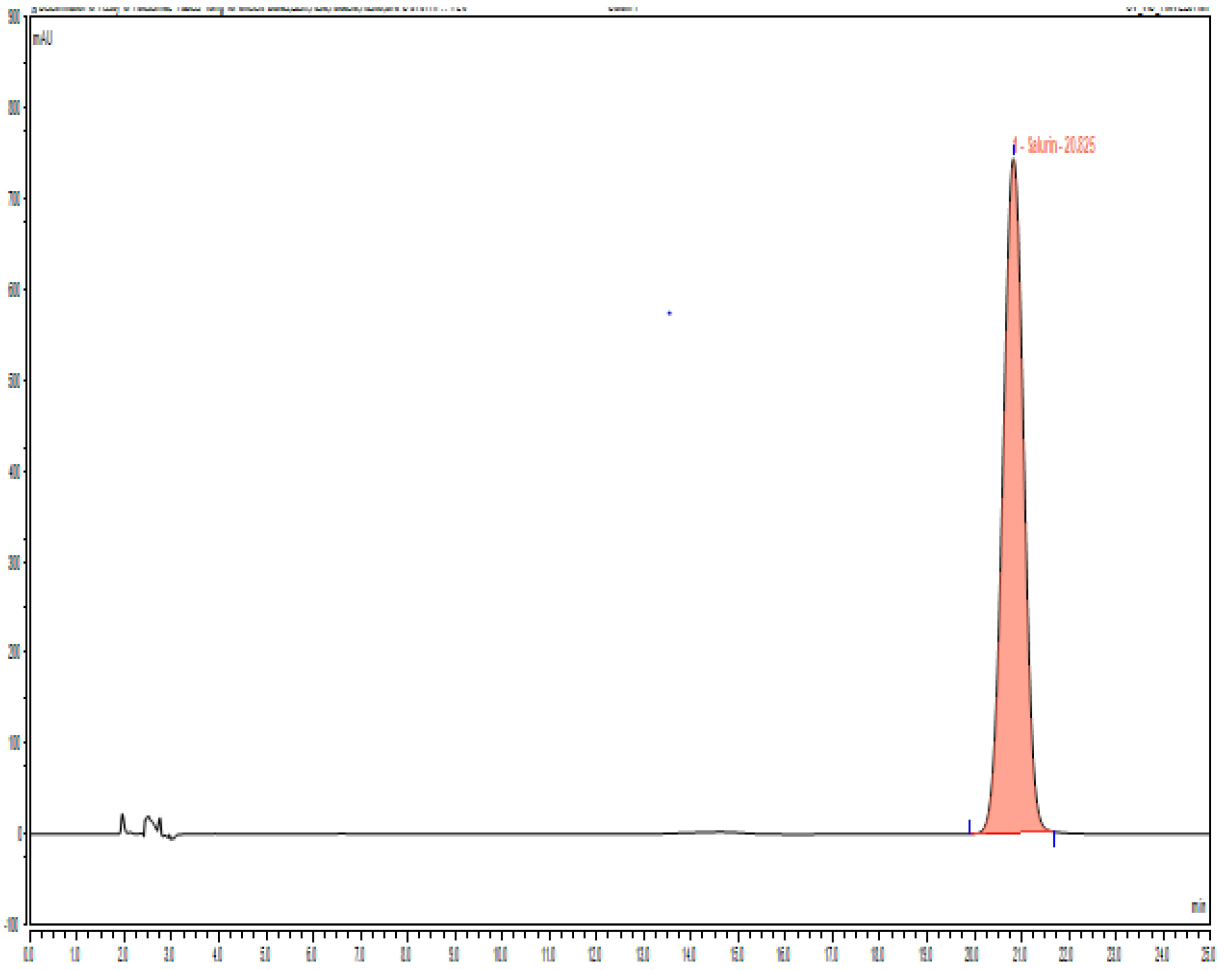

Figure S5: Chromatogram of Salurin tablets

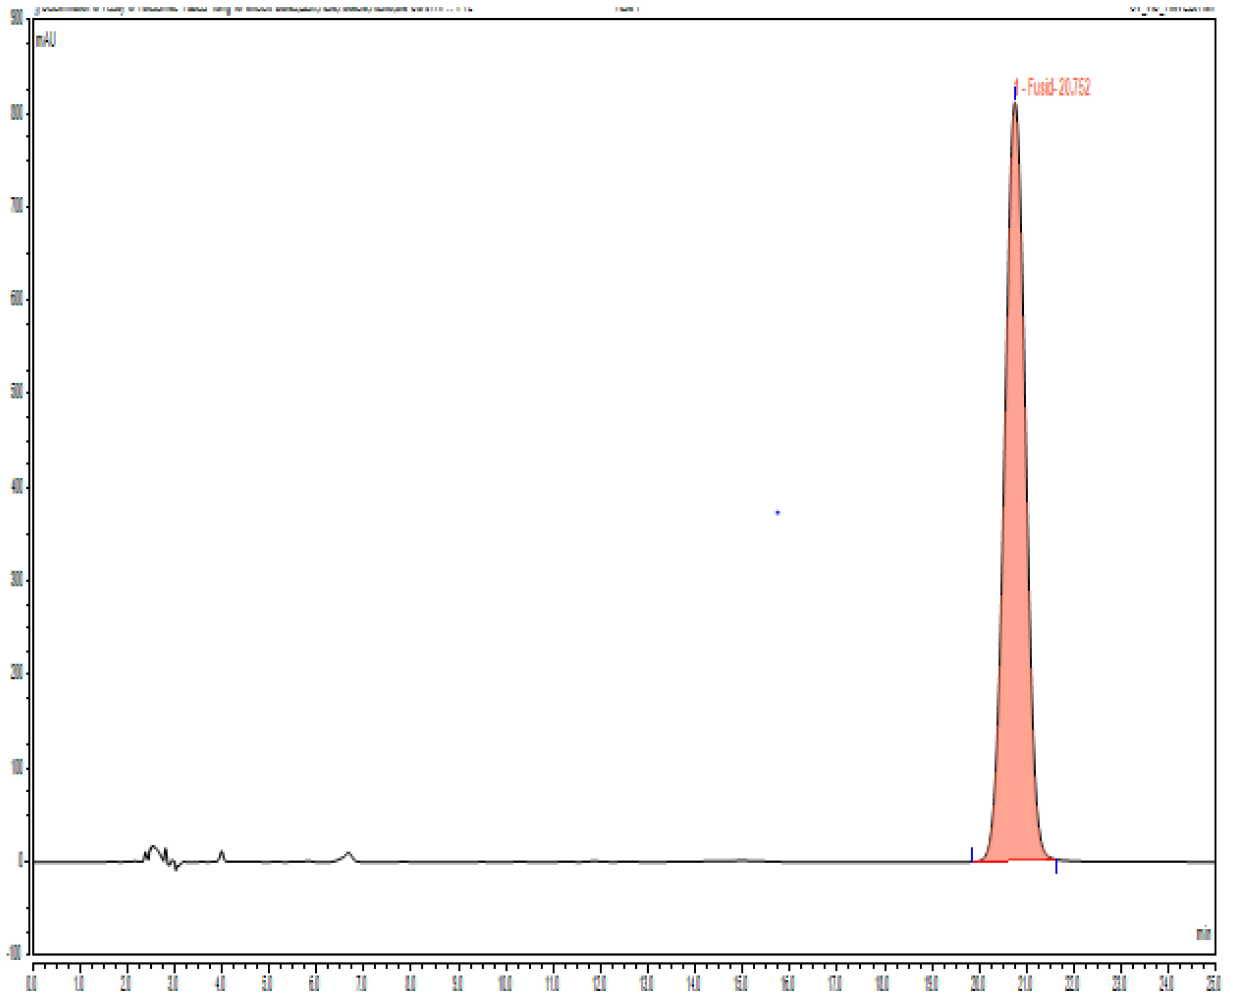

Figure S6: Chromatograph of Fusid tablets
